# Supplementary material for: Identification of Circulating miR-762 as a Novel Diagnostic and Prognostic Biomarker for Non-Small Cell Lung Cancer
Source: PubMed Central journal article supplement — Technol Cancer Res Treat. 2020 Dec 15;19:1533033820964222. doi: 10.1177/1533033820964222 (PMC7745551; doi:10.1177/1533033820964222), 2020-12-15
Supplement: Supplementary_Table_1_(3).pdf [file Supplementary_Table_1_%283%29.pdf]

**Supplementary Table 1. The significantly altered miRNAs in NSCLC tissues compared to the normal control tissues**

| <b>miRNA ID</b>   | <b>Accession ID</b> | <b>Log<sub>2</sub>FC (NSCLC/normal)</b> | <b>P value</b> |
|-------------------|---------------------|-----------------------------------------|----------------|
| hsa-miR-375       | MIMAT0000728        | 1.431                                   | 1.03E-03       |
| hsa-miR-497-5p    | MIMAT0002820        | 1.655                                   | 2.73E-04       |
| has-miR-762       | MIMAT0010313        | 2.916                                   | 7.67E-05       |
| hsa-miR-326       | MIMAT0000756        | 2.027                                   | 7.28E-05       |
| hsa-miR-628-5p    | MIMAT0004809        | 1.574                                   | 7.42E-04       |
| hsa-miR-744-3p    | MIMAT0004946        | 2.198                                   | 1.38E-05       |
| hsa-miR-652-3p    | MIMAT0003322        | 2.435                                   | 1.89E-05       |
| hsa-miR-944       | MIMAT0004987        | 1.535                                   | 6.69E-03       |
| hsa-miR-671-5p    | MIMAT0003880        | 3.160                                   | 2.08E-06       |
| hsa-miR-935       | MIMAT0004978        | 3.681                                   | 9.49E-05       |
| hsa-miR-320a      | MIMAT0000510        | 1.448                                   | 4.77E-02       |
| hsa-miR-3605-3p   | MIMAT0017982        | 1.035                                   | 1.51E-02       |
| hsa-miR-21-3p     | MIMAT0004494        | 1.138                                   | 4.65E-02       |
| hsa-miR-192-5p    | MIMAT0000222        | 1.414                                   | 6.72E-03       |
| hsa-miR-193a-3p   | MIMAT0000459        | 1.581                                   | 6.71E-03       |
| hsa-miR-2355-3p   | MIMAT0017950        | 2.215                                   | 6.50E-04       |
| hsa-let-7e-5p     | MIMAT0000066        | 1.734                                   | 8.72E-03       |
| hsa-miR-193b-3p   | MIMAT0002819        | 2.491                                   | 1.47E-05       |
| hsa-miR-193a-5p   | MIMAT0004614        | 1.845                                   | 4.03E-04       |
| hsa-miR-92b-3p    | MIMAT0003218        | 2.130                                   | 6.75E-04       |
| hsa-miR-125b-1-3p | MIMAT0004592        | 1.565                                   | 5.22E-05       |
| hsa-miR-3922-3p   | MIMAT0018197        | 2.612                                   | 1.50E-05       |
| hsa-miR-193b-5p   | MIMAT0004767        | 2.208                                   | 1.79E-05       |
| hsa-miR-3130-5p   | MIMAT0014995        | 2.691                                   | 8.97E-06       |
| hsa-miR-215-5p    | MIMAT0000272        | 2.683                                   | 8.66E-05       |
| hsa-miR-431-5p    | MIMAT0001625        | 1.064                                   | 3.69E-02       |
| hsa-miR-889-3p    | MIMAT0004921        | 1.489                                   | 2.57E-03       |
| hsa-miR-183-3p    | MIMAT0004560        | 1.185                                   | 1.31E-02       |
| hsa-miR-1266-5p   | MIMAT0005920        | 2.701                                   | 6.36E-05       |
| hsa-miR-381-3p    | MIMAT0000736        | 2.628                                   | 6.81E-05       |
| hsa-miR-423-5p    | MIMAT0004748        | 1.513                                   | 5.69E-03       |
| hsa-miR-125a-3p   | MIMAT0004602        | 1.517                                   | 7.24E-03       |
| hsa-miR-2116-3p   | MIMAT0011161        | 1.310                                   | 9.56E-03       |
| hsa-miR-584-5p    | MIMAT0003249        | 1.192                                   | 4.16E-02       |
| hsa-miR-132-3p    | MIMAT0000426        | 2.267                                   | 6.03E-04       |
| hsa-miR-1468-5p   | MIMAT0006789        | -1.277                                  | 7.66E-04       |
| hsa-miR-99a-3p    | MIMAT0004511        | -1.260                                  | 1.08E-02       |
| hsa-miR-30b-5p    | MIMAT0000420        | -2.104                                  | 2.96E-05       |
| hsa-miR-199b-5p   | MIMAT0000263        | -1.997                                  | 8.09E-04       |
| hsa-miR-30c-5p    | MIMAT0000244        | -1.285                                  | 8.94E-03       |

|                   |              |        |          |
|-------------------|--------------|--------|----------|
| hsa-let-7c-5p     | MIMAT0000064 | -1.395 | 6.19E-04 |
| hsa-miR-30e-3p    | MIMAT0000693 | -2.255 | 6.77E-05 |
| hsa-miR-374b-3p   | MIMAT0004956 | -2.105 | 8.58E-05 |
| hsa-miR-500a-3p   | MIMAT0002871 | -1.498 | 4.31E-03 |
| hsa-miR-502-3p    | MIMAT0004775 | -2.352 | 8.34E-05 |
| hsa-miR-187-3p    | MIMAT0000262 | -1.717 | 2.32E-03 |
| hsa-miR-429       | MIMAT0001536 | -1.227 | 1.88E-02 |
| hsa-miR-3199      | MIMAT0015084 | -1.276 | 2.45E-02 |
| hsa-miR-501-3p    | MIMAT0004774 | -1.118 | 2.40E-02 |
| hsa-miR-374a-5p   | MIMAT0000727 | -1.820 | 6.77E-03 |
| hsa-miR-200b-3p   | MIMAT0000318 | -1.155 | 3.83E-02 |
| hsa-miR-133b      | MIMAT0000770 | -2.035 | 9.17E-03 |
| hsa-miR-125b-2-3p | MIMAT0004603 | -2.385 | 6.59E-05 |
| hsa-miR-204-5p    | MIMAT0000265 | -2.218 | 6.64E-04 |
| hsa-miR-940       | MIMAT0004983 | -1.856 | 2.61E-04 |
| hsa-miR-184       | MIMAT0000454 | -1.426 | 5.63E-03 |
| hsa-miR-320c      | MIMAT0005793 | -1.474 | 4.97E-02 |
| hsa-miR-769-3p    | MIMAT0003887 | -1.912 | 7.60E-04 |
| hsa-miR-503-5p    | MIMAT0002874 | -1.378 | 5.66E-03 |
| hsa-miR-370-5p    | MIMAT0026483 | -2.281 | 6.19E-04 |
| hsa-miR-221-3p    | MIMAT0000278 | -1.937 | 2.12E-03 |
| hsa-miR-424-5p    | MIMAT0001341 | -1.988 | 2.59E-04 |

---
