# Supplementary material for: Identification of Circulating miR-762 as a Novel Diagnostic and Prognostic Biomarker for Non-Small Cell Lung Cancer
Source: PubMed Central journal article supplement — Technol Cancer Res Treat. 2020 Dec 15;19:1533033820964222. doi: 10.1177/1533033820964222 (PMC7745551; doi:10.1177/1533033820964222), 2020-12-15
Supplement: Supplementary_Table_2.pdf [file Supplementary_Table_2.pdf]

**Supplementary Table 2. The potential downstream targets of miR-762**

| <b>miRNA Name</b> | <b>Gene Symbol</b> | <b>Gene Description</b>                                              |
|-------------------|--------------------|----------------------------------------------------------------------|
| hsa-miR-762       | NFIX               | nuclear factor I X                                                   |
| hsa-miR-762       | PACS1              | phosphofurin acidic cluster sorting protein 1                        |
| hsa-miR-762       | GIPC3              | GIPC PDZ domain containing family member 3                           |
| hsa-miR-762       | ACVRL1             | activin A receptor like type 1                                       |
| hsa-miR-762       | SOGA1              | suppressor of glucose, autophagy associated 1                        |
| hsa-miR-762       | KCNIP3             | potassium voltage-gated channel interacting protein 3                |
| hsa-miR-762       | YY1AP1             | YY1 associated protein 1                                             |
| hsa-miR-762       | BCAM               | basal cell adhesion molecule (Lutheran blood group)                  |
| hsa-miR-762       | KCNS1              | potassium voltage-gated channel modifier subfamily S member 1        |
| hsa-miR-762       | PHLDB1             | pleckstrin homology like domain family B member 1                    |
| hsa-miR-762       | WDR48              | WD repeat domain 48                                                  |
| hsa-miR-762       | GNAI2              | G protein subunit alpha i2                                           |
| hsa-miR-762       | JMJD8              | jumonji domain containing 8                                          |
| hsa-miR-762       | MDGA1              | MAM domain containing glycosylphosphatidylinositol anchor 1          |
| hsa-miR-762       | PML                | promyelocytic leukemia                                               |
| hsa-miR-762       | EVC                | EvC ciliary complex subunit 1                                        |
| hsa-miR-762       | SMPD3              | sphingomyelin phosphodiesterase 3                                    |
| hsa-miR-762       | SLC6A17            | solute carrier family 6 member 17                                    |
| hsa-miR-762       | PEX14              | peroxisomal biogenesis factor 14                                     |
| hsa-miR-762       | MYO1C              | myosin IC                                                            |
| hsa-miR-762       | NATD1              | N-acetyltransferase domain containing 1                              |
| hsa-miR-762       | RAP1GAP2           | RAP1 GTPase activating protein 2                                     |
| hsa-miR-762       | ARHGAP1            | Rho GTPase activating protein 1                                      |
| hsa-miR-762       | ARL2BP             | ADP ribosylation factor like GTPase 2 binding protein                |
| hsa-miR-762       | KIAA0930           | KIAA0930                                                             |
| hsa-miR-762       | SDK2               | sidekick cell adhesion molecule 2                                    |
| hsa-miR-762       | TMCC3              | transmembrane and coiled-coil domain family 3                        |
| hsa-miR-762       | CPLX2              | complexin 2                                                          |
| hsa-miR-762       | ZNF609             | zinc finger protein 609                                              |
| hsa-miR-762       | NECTIN1            | nectin cell adhesion molecule 1                                      |
| hsa-miR-762       | ZNF219             | zinc finger protein 219                                              |
| hsa-miR-762       | IQSEC2             | IQ motif and Sec7 domain 2                                           |
| hsa-miR-762       | APLN               | apelin                                                               |
| hsa-miR-762       | RAB6B              | RAB6B, member RAS oncogene family                                    |
| hsa-miR-762       | ZFR2               | zinc finger RNA binding protein 2                                    |
| hsa-miR-762       | KIAA0513           | KIAA0513                                                             |
| hsa-miR-762       | ABCF2              | ATP binding cassette subfamily F member 2                            |
| hsa-miR-762       | ARID3B             | AT-rich interaction domain 3B                                        |
| hsa-miR-762       | OLFML2A            | olfactomedin like 2A                                                 |
| hsa-miR-762       | PPM1H              | protein phosphatase, Mg <sup>2+</sup> /Mn <sup>2+</sup> dependent 1H |
| hsa-miR-762       | PARVG              | parvin gamma                                                         |

|             |          |                                                                 |
|-------------|----------|-----------------------------------------------------------------|
| hsa-miR-762 | CRTC1    | CREB regulated transcription coactivator 1                      |
| hsa-miR-762 | ATP2B2   | ATPase plasma membrane Ca <sup>2+</sup> transporting 2          |
| hsa-miR-762 | SDC3     | syndecan 3                                                      |
| hsa-miR-762 | ENG      | endoglin                                                        |
| hsa-miR-762 | STK40    | serine/threonine kinase 40                                      |
| hsa-miR-762 | LARP1    | La ribonucleoprotein domain family member 1                     |
| hsa-miR-762 | CNP      | 2',3'-cyclic nucleotide 3' phosphodiesterase                    |
| hsa-miR-762 | FBXO41   | F-box protein 41                                                |
| hsa-miR-762 | TYSND1   | trypsin domain containing 1                                     |
| hsa-miR-762 | OSBP2    | oxysterol binding protein 2                                     |
| hsa-miR-762 | PTPRF    | protein tyrosine phosphatase, receptor type F                   |
| hsa-miR-762 | IGFBP5   | insulin like growth factor binding protein 5                    |
| hsa-miR-762 | ACE      | angiotensin I converting enzyme                                 |
| hsa-miR-762 | SEMA7A   | semaphorin 7A (John Milton Hagen blood group)                   |
| hsa-miR-762 | RNF20    | ring finger protein 20                                          |
| hsa-miR-762 | SLC2A8   | solute carrier family 2 member 8                                |
| hsa-miR-762 | CLIP3    | CAP-Gly domain containing linker protein 3                      |
| hsa-miR-762 | ADGRL1   | adhesion G protein-coupled receptor L1                          |
| hsa-miR-762 | CNIH2    | cornichon family AMPA receptor auxiliary protein 2              |
| hsa-miR-762 | CDYL2    | chromodomain Y like 2                                           |
| hsa-miR-762 | LZTS1    | leucine zipper tumor suppressor 1                               |
| hsa-miR-762 | TAGLN    | transgelin                                                      |
| hsa-miR-762 | PLXDC2   | plexin domain containing 2                                      |
| hsa-miR-762 | TRMT61A  | tRNA methyltransferase 61A                                      |
| hsa-miR-762 | RELT     | RELT, TNF receptor                                              |
| hsa-miR-762 | GNG13    | G protein subunit gamma 13                                      |
| hsa-miR-762 | PPIE     | peptidylprolyl isomerase E                                      |
| hsa-miR-762 | SYNDIG1L | synapse differentiation inducing 1 like                         |
| hsa-miR-762 | TOX2     | TOX high mobility group box family member 2                     |
| hsa-miR-762 | JPH3     | junctionophilin 3                                               |
| hsa-miR-762 | BTF3L4   | basic transcription factor 3 like 4                             |
| hsa-miR-762 | ERC1     | ELKS/RAB6-interacting/CAST family member 1                      |
| hsa-miR-762 | PKP2     | plakophilin 2                                                   |
| hsa-miR-762 | COPS7B   | COP9 signalosome subunit 7B                                     |
| hsa-miR-762 | PKIG     | cAMP-dependent protein kinase inhibitor gamma                   |
| hsa-miR-762 | SLC45A2  | solute carrier family 45 member 2                               |
| hsa-miR-762 | CPEB3    | cytoplasmic polyadenylation element binding protein 3           |
| hsa-miR-762 | MFAP1    | microfibril associated protein 1                                |
| hsa-miR-762 | BCL2L13  | BCL2 like 13                                                    |
| hsa-miR-762 | EEFSEC   | eukaryotic elongation factor, selenocysteine-tRNA specific      |
| hsa-miR-762 | ZBTB4    | zinc finger and BTB domain containing 4                         |
| hsa-miR-762 | NMD3     | NMD3 ribosome export adaptor                                    |
| hsa-miR-762 | STRBP    | spermatid perinuclear RNA binding protein                       |
| hsa-miR-762 | SPOCK2   | SPARC (osteonectin), cwcv and kazal like domains proteoglycan 2 |

|             |          |                                                                  |
|-------------|----------|------------------------------------------------------------------|
| hsa-miR-762 | NAP1L3   | nucleosome assembly protein 1 like 3                             |
| hsa-miR-762 | CPSF7    | cleavage and polyadenylation specific factor 7                   |
| hsa-miR-762 | ZNF672   | zinc finger protein 672                                          |
| hsa-miR-762 | CLDN18   | claudin 18                                                       |
| hsa-miR-762 | MPZL2    | myelin protein zero like 2                                       |
| hsa-miR-762 | PRLHR    | prolactin releasing hormone receptor                             |
| hsa-miR-762 | ARRB1    | arrestin beta 1                                                  |
| hsa-miR-762 | CTCF     | CCCTC-binding factor                                             |
| hsa-miR-762 | RAB35    | RAB35, member RAS oncogene family                                |
| hsa-miR-762 | VAMP1    | vesicle associated membrane protein 1                            |
| hsa-miR-762 | SYNJ1    | synaptojanin 1                                                   |
| hsa-miR-762 | ST5      | suppression of tumorigenicity 5                                  |
| hsa-miR-762 | SHB      | SH2 domain containing adaptor protein B                          |
| hsa-miR-762 | UBA1     | ubiquitin like modifier activating enzyme 1                      |
| hsa-miR-762 | SH3PXD2A | SH3 and PX domains 2A                                            |
| hsa-miR-762 | TRAF7    | TNF receptor associated factor 7                                 |
| hsa-miR-762 | TM2D3    | TM2 domain containing 3                                          |
| hsa-miR-762 | LIFR     | LIF receptor alpha                                               |
| hsa-miR-762 | STUM     | stum, mechanosensory transduction mediator homolog               |
| hsa-miR-762 | NCOR1    | nuclear receptor corepressor 1                                   |
| hsa-miR-762 | ITCH     | itchy E3 ubiquitin protein ligase                                |
| hsa-miR-762 | SH3PXD2B | SH3 and PX domains 2B                                            |
| hsa-miR-762 | PMM2     | phosphomannomutase 2                                             |
| hsa-miR-762 | CDC42SE1 | CDC42 small effector 1                                           |
| hsa-miR-762 | SZT2     | SZT2, KICSTOR complex subunit                                    |
| hsa-miR-762 | GSK3A    | glycogen synthase kinase 3 alpha                                 |
| hsa-miR-762 | TTL      | tubulin tyrosine ligase                                          |
| hsa-miR-762 | PPIL2    | peptidylprolyl isomerase like 2                                  |
| hsa-miR-762 | TTYH3    | tweety family member 3                                           |
| hsa-miR-762 | TRAF1    | TNF receptor associated factor 1                                 |
| hsa-miR-762 | CLCNKB   | chloride voltage-gated channel Kb                                |
| hsa-miR-762 | MAP6D1   | MAP6 domain containing 1                                         |
| hsa-miR-762 | REXO1    | RNA exonuclease 1 homolog                                        |
| hsa-miR-762 | TRPM3    | transient receptor potential cation channel subfamily M member 3 |
| hsa-miR-762 | GLIS2    | GLIS family zinc finger 2                                        |
| hsa-miR-762 | GPRIN1   | G protein regulated inducer of neurite outgrowth 1               |
| hsa-miR-762 | TAOK2    | TAO kinase 2                                                     |
| hsa-miR-762 | PDE4D    | phosphodiesterase 4D                                             |
| hsa-miR-762 | KIF21B   | kinesin family member 21B                                        |
| hsa-miR-762 | NFIC     | nuclear factor I C                                               |
| hsa-miR-762 | CLDND1   | claudin domain containing 1                                      |
| hsa-miR-762 | RAB5A    | RAB5A, member RAS oncogene family                                |
| hsa-miR-762 | RPL28    | ribosomal protein L28                                            |
| hsa-miR-762 | GPBP1L1  | GC-rich promoter binding protein 1 like 1                        |

|             |         |                                                               |
|-------------|---------|---------------------------------------------------------------|
| hsa-miR-762 | PRCD    | photoreceptor disc component                                  |
| hsa-miR-762 | CERS1   | ceramide synthase 1                                           |
| hsa-miR-762 | NKIRAS2 | NFKB inhibitor interacting Ras like 2                         |
| hsa-miR-762 | PKLR    | pyruvate kinase L/R                                           |
| hsa-miR-762 | GAB1    | GRB2 associated binding protein 1                             |
| hsa-miR-762 | LRP1    | LDL receptor related protein 1                                |
| hsa-miR-762 | TTL6    | tubulin tyrosine ligase like 6                                |
| hsa-miR-762 | APC2    | APC2, WNT signaling pathway regulator                         |
| hsa-miR-762 | DNAJB5  | DnaJ heat shock protein family (Hsp40) member B5              |
| hsa-miR-762 | ACVR1B  | activin A receptor type 1B                                    |
| hsa-miR-762 | MECP2   | methyl-CpG binding protein 2                                  |
| hsa-miR-762 | ZNF395  | zinc finger protein 395                                       |
| hsa-miR-762 | SEMA6A  | semaphorin 6A                                                 |
| hsa-miR-762 | WARS    | tryptophanyl-tRNA synthetase                                  |
| hsa-miR-762 | MBTD1   | mbt domain containing 1                                       |
| hsa-miR-762 | KLK4    | kallikrein related peptidase 4                                |
| hsa-miR-762 | CDR2L   | cerebellar degeneration related protein 2 like                |
| hsa-miR-762 | GRIK3   | glutamate ionotropic receptor kainate type subunit 3          |
| hsa-miR-762 | NDRG4   | NDRG family member 4                                          |
| hsa-miR-762 | EIF5    | eukaryotic translation initiation factor 5                    |
| hsa-miR-762 | PAX7    | paired box 7                                                  |
| hsa-miR-762 | SYT7    | synaptotagmin 7                                               |
| hsa-miR-762 | CUEDC1  | CUE domain containing 1                                       |
| hsa-miR-762 | FAM219A | family with sequence similarity 219 member A                  |
| hsa-miR-762 | NPTX1   | neuronal pentraxin 1                                          |
| hsa-miR-762 | PPP3R2  | protein phosphatase 3 regulatory subunit B, beta              |
| hsa-miR-762 | PLXNA1  | plexin A1                                                     |
| hsa-miR-762 | HSPB6   | heat shock protein family B (small) member 6                  |
| hsa-miR-762 | SRSF7   | serine and arginine rich splicing factor 7                    |
| hsa-miR-762 | ABCF1   | ATP binding cassette subfamily F member 1                     |
| hsa-miR-762 | TBL1XR1 | transducin beta like 1 X-linked receptor 1                    |
| hsa-miR-762 | FBXL16  | F-box and leucine rich repeat protein 16                      |
| hsa-miR-762 | ST3GAL1 | ST3 beta-galactoside alpha-2,3-sialyltransferase 1            |
| hsa-miR-762 | SON     | SON DNA binding protein                                       |
| hsa-miR-762 | GF11    | growth factor independent 1 transcriptional repressor         |
| hsa-miR-762 | AOC3    | amine oxidase, copper containing 3                            |
| hsa-miR-762 | ZFP41   | ZFP41 zinc finger protein                                     |
| hsa-miR-762 | AP5B1   | adaptor related protein complex 5 subunit beta 1              |
| hsa-miR-762 | SEPSECS | Sep (O-phosphoserine) tRNA:Sec (selenocysteine) tRNA synthase |
| hsa-miR-762 | NKAIN2  | sodium/potassium transporting ATPase interacting 2            |
| hsa-miR-762 | SLC12A4 | solute carrier family 12 member 4                             |
| hsa-miR-762 | HOXA7   | homeobox A7                                                   |
| hsa-miR-762 | ZNF346  | zinc finger protein 346                                       |
| hsa-miR-762 | CLDN19  | claudin 19                                                    |

|             |          |                                                                      |
|-------------|----------|----------------------------------------------------------------------|
| hsa-miR-762 | RPIA     | ribose 5-phosphate isomerase A                                       |
| hsa-miR-762 | CLCN5    | chloride voltage-gated channel 5                                     |
| hsa-miR-762 | TRABD2B  | TraB domain containing 2B                                            |
| hsa-miR-762 | CLCF1    | cardiotrophin like cytokine factor 1                                 |
| hsa-miR-762 | DCANP1   | dendritic cell associated nuclear protein                            |
| hsa-miR-762 | MPRIP    | myosin phosphatase Rho interacting protein                           |
| hsa-miR-762 | DIAPH1   | diaphanous related formin 1                                          |
| hsa-miR-762 | TLX1     | T cell leukemia homeobox 1                                           |
| hsa-miR-762 | WHRN     | whirlin                                                              |
| hsa-miR-762 | PAQR4    | progesterin and adipoQ receptor family member 4                      |
| hsa-miR-762 | EFNB3    | ephrin B3                                                            |
| hsa-miR-762 | FOXP2    | forkhead box P2                                                      |
| hsa-miR-762 | RAB7A    | RAB7A, member RAS oncogene family                                    |
| hsa-miR-762 | BRD3     | bromodomain containing 3                                             |
| hsa-miR-762 | TNC      | tenascin C                                                           |
| hsa-miR-762 | MYL12A   | myosin light chain 12A                                               |
| hsa-miR-762 | CAPN15   | calpain 15                                                           |
| hsa-miR-762 | NCS1     | neuronal calcium sensor 1                                            |
| hsa-miR-762 | OTOF     | otoferlin                                                            |
| hsa-miR-762 | FBXL18   | F-box and leucine rich repeat protein 18                             |
| hsa-miR-762 | PARN     | poly(A)-specific ribonuclease                                        |
| hsa-miR-762 | AKT3     | AKT serine/threonine kinase 3                                        |
| hsa-miR-762 | NAA60    | N(alpha)-acetyltransferase 60, NatF catalytic subunit                |
| hsa-miR-762 | NAT8L    | N-acetyltransferase 8 like                                           |
| hsa-miR-762 | SLC8A2   | solute carrier family 8 member A2                                    |
| hsa-miR-762 | PPP1R16B | protein phosphatase 1 regulatory subunit 16B                         |
| hsa-miR-762 | LOXL3    | lysyl oxidase like 3                                                 |
| hsa-miR-762 | ADGRA2   | adhesion G protein-coupled receptor A2                               |
| hsa-miR-762 | ARNT2    | aryl hydrocarbon receptor nuclear translocator 2                     |
| hsa-miR-762 | PPM1M    | protein phosphatase, Mg <sup>2+</sup> /Mn <sup>2+</sup> dependent 1M |
| hsa-miR-762 | SLC1A3   | solute carrier family 1 member 3                                     |
| hsa-miR-762 | MEN1     | menin 1                                                              |
| hsa-miR-762 | BHMT2    | betaine--homocysteine S-methyltransferase 2                          |
| hsa-miR-762 | TXN2     | thioredoxin 2                                                        |
| hsa-miR-762 | SNX19    | sorting nexin 19                                                     |
| hsa-miR-762 | SLC35F5  | solute carrier family 35 member F5                                   |
| hsa-miR-762 | CDK18    | cyclin dependent kinase 18                                           |
| hsa-miR-762 | ARMC3    | armadillo repeat containing 3                                        |
| hsa-miR-762 | C19orf54 | chromosome 19 open reading frame 54                                  |
| hsa-miR-762 | ADGRG3   | adhesion G protein-coupled receptor G3                               |
| hsa-miR-762 | FAM240A  | family with sequence similarity 240 member A                         |
| hsa-miR-762 | TMEM178B | transmembrane protein 178B                                           |
| hsa-miR-762 | LIMS4    | LIM zinc finger domain containing 4                                  |
| hsa-miR-762 | LIMS3    | LIM zinc finger domain containing 3                                  |

|             |              |                                                       |
|-------------|--------------|-------------------------------------------------------|
| hsa-miR-762 | PTCD1        | pentatricopeptide repeat domain 1                     |
| hsa-miR-762 | FAM192A      | family with sequence similarity 192 member A          |
| hsa-miR-762 | IGSF8        | immunoglobulin superfamily member 8                   |
| hsa-miR-762 | ATP5MF-PTCD1 | ATP5MF-PTCD1 readthrough                              |
| hsa-miR-762 | ENGASE       | endo-beta-N-acetylglucosaminidase                     |
| hsa-miR-762 | CPNE2        | copine 2                                              |
| hsa-miR-762 | CBX7         | chromobox 7                                           |
| hsa-miR-762 | ABCG4        | ATP binding cassette subfamily G member 4             |
| hsa-miR-762 | CLIP2        | CAP-Gly domain containing linker protein 2            |
| hsa-miR-762 | CASP10       | caspase 10                                            |
| hsa-miR-762 | PCDHGB6      | protocadherin gamma subfamily B, 6                    |
| hsa-miR-762 | TMEM127      | transmembrane protein 127                             |
| hsa-miR-762 | PCDHGA8      | protocadherin gamma subfamily A, 8                    |
| hsa-miR-762 | PPP1R11      | protein phosphatase 1 regulatory inhibitor subunit 11 |
| hsa-miR-762 | TRAPP9       | trafficking protein particle complex 9                |
| hsa-miR-762 | PCDHGA10     | protocadherin gamma subfamily A, 10                   |
| hsa-miR-762 | PCDHGC4      | protocadherin gamma subfamily C, 4                    |
| hsa-miR-762 | PCDHGB7      | protocadherin gamma subfamily B, 7                    |
| hsa-miR-762 | PCDHGC3      | protocadherin gamma subfamily C, 3                    |
| hsa-miR-762 | IRF5         | interferon regulatory factor 5                        |
| hsa-miR-762 | PCDHGA11     | protocadherin gamma subfamily A, 11                   |
| hsa-miR-762 | PCDHGA2      | protocadherin gamma subfamily A, 2                    |
| hsa-miR-762 | PCDHGA1      | protocadherin gamma subfamily A, 1                    |
| hsa-miR-762 | PCDHGB2      | protocadherin gamma subfamily B, 2                    |
| hsa-miR-762 | MID2         | midline 2                                             |
| hsa-miR-762 | USP30        | ubiquitin specific peptidase 30                       |
| hsa-miR-762 | CYP26B1      | cytochrome P450 family 26 subfamily B member 1        |
| hsa-miR-762 | LMF2         | lipase maturation factor 2                            |
| hsa-miR-762 | ARHGEF40     | Rho guanine nucleotide exchange factor 40             |
| hsa-miR-762 | PCDHGB1      | protocadherin gamma subfamily B, 1                    |
| hsa-miR-762 | PCDHGB5      | protocadherin gamma subfamily B, 5                    |
| hsa-miR-762 | PRKACA       | protein kinase cAMP-activated catalytic subunit alpha |
| hsa-miR-762 | PCDHGB3      | protocadherin gamma subfamily B, 3                    |
| hsa-miR-762 | PRAF2        | PRA1 domain family member 2                           |
| hsa-miR-762 | PCDHGA9      | protocadherin gamma subfamily A, 9                    |
| hsa-miR-762 | PCDHGA5      | protocadherin gamma subfamily A, 5                    |
| hsa-miR-762 | PCDHGA3      | protocadherin gamma subfamily A, 3                    |
| hsa-miR-762 | PCDHGA6      | protocadherin gamma subfamily A, 6                    |
| hsa-miR-762 | PCDHGA7      | protocadherin gamma subfamily A, 7                    |
| hsa-miR-762 | SLC37A2      | solute carrier family 37 member 2                     |
| hsa-miR-762 | BPTF         | bromodomain PHD finger transcription factor           |
| hsa-miR-762 | PCDHGA4      | protocadherin gamma subfamily A, 4                    |
| hsa-miR-762 | DNM1         | dynamamin 1                                           |
| hsa-miR-762 | GRM2         | glutamate metabotropic receptor 2                     |

|             |          |                                                                      |
|-------------|----------|----------------------------------------------------------------------|
| hsa-miR-762 | PCDHGB4  | protocadherin gamma subfamily B, 4                                   |
| hsa-miR-762 | PCDHGC5  | protocadherin gamma subfamily C, 5                                   |
| hsa-miR-762 | FAM170B  | family with sequence similarity 170 member B                         |
| hsa-miR-762 | BTBD9    | BTB domain containing 9                                              |
| hsa-miR-762 | ZDHHC22  | zinc finger DHHC-type containing 22                                  |
| hsa-miR-762 | PCDHGA12 | protocadherin gamma subfamily A, 12                                  |
| hsa-miR-762 | NMNAT2   | nicotinamide nucleotide adenyltransferase 2                          |
| hsa-miR-762 | NPLOC4   | NPL4 homolog, ubiquitin recognition factor                           |
| hsa-miR-762 | EPHB2    | EPH receptor B2                                                      |
| hsa-miR-762 | ZNF594   | zinc finger protein 594                                              |
| hsa-miR-762 | TXLNA    | taxilin alpha                                                        |
| hsa-miR-762 | PKM      | pyruvate kinase M1/2                                                 |
| hsa-miR-762 | SLC46A1  | solute carrier family 46 member 1                                    |
| hsa-miR-762 | CEP85    | centrosomal protein 85                                               |
| hsa-miR-762 | CELF3    | CUGBP Elav-like family member 3                                      |
| hsa-miR-762 | NFX1     | nuclear transcription factor, X-box binding 1                        |
| hsa-miR-762 | VWA3A    | von Willebrand factor A domain containing 3A                         |
| hsa-miR-762 | STRA6    | stimulated by retinoic acid 6                                        |
| hsa-miR-762 | NNAT     | neuronatin                                                           |
| hsa-miR-762 | CBX6     | chromobox 6                                                          |
| hsa-miR-762 | RNF44    | ring finger protein 44                                               |
| hsa-miR-762 | SAMD11   | sterile alpha motif domain containing 11                             |
| hsa-miR-762 | ZNF385A  | zinc finger protein 385A                                             |
| hsa-miR-762 | VDR      | vitamin D receptor                                                   |
| hsa-miR-762 | HCFC1    | host cell factor C1                                                  |
| hsa-miR-762 | TMEM41A  | transmembrane protein 41A                                            |
| hsa-miR-762 | IRF2     | interferon regulatory factor 2                                       |
| hsa-miR-762 | TMEM151B | transmembrane protein 151B                                           |
| hsa-miR-762 | PPM1F    | protein phosphatase, Mg <sup>2+</sup> /Mn <sup>2+</sup> dependent 1F |
| hsa-miR-762 | DACT2    | dishevelled binding antagonist of beta catenin 2                     |
| hsa-miR-762 | CENPP    | centromere protein P                                                 |
| hsa-miR-762 | NCSTN    | nicastrin                                                            |
| hsa-miR-762 | SCRT1    | scratch family transcriptional repressor 1                           |
| hsa-miR-762 | TMC7     | transmembrane channel like 7                                         |
| hsa-miR-762 | CLCNKA   | chloride voltage-gated channel Ka                                    |
| hsa-miR-762 | XXYLT1   | xyloside xylosyltransferase 1                                        |
| hsa-miR-762 | ARHGDI1A | Rho GDP dissociation inhibitor alpha                                 |
| hsa-miR-762 | CRAMP1   | cramped chromatin regulator homolog 1                                |
| hsa-miR-762 | SLC9A3   | solute carrier family 9 member A3                                    |
| hsa-miR-762 | SLCO3A1  | solute carrier organic anion transporter family member 3A1           |
| hsa-miR-762 | BARHL1   | BarH like homeobox 1                                                 |
| hsa-miR-762 | CPNE5    | copine 5                                                             |
| hsa-miR-762 | GTPBP1   | GTP binding protein 1                                                |
| hsa-miR-762 | LHX3     | LIM homeobox 3                                                       |

|             |          |                                                             |
|-------------|----------|-------------------------------------------------------------|
| hsa-miR-762 | SPIB     | Spi-B transcription factor                                  |
| hsa-miR-762 | TBC1D5   | TBC1 domain family member 5                                 |
| hsa-miR-762 | MRAS     | muscle RAS oncogene homolog                                 |
| hsa-miR-762 | LRRC4B   | leucine rich repeat containing 4B                           |
| hsa-miR-762 | HLA-DOB  | major histocompatibility complex, class II, DO beta         |
| hsa-miR-762 | METRN    | meteorin, glial cell differentiation regulator              |
| hsa-miR-762 | DDX54    | DEAD-box helicase 54                                        |
| hsa-miR-762 | TRIM66   | tripartite motif containing 66                              |
| hsa-miR-762 | KDSR     | 3-ketodihydrosphingosine reductase                          |
| hsa-miR-762 | PROM2    | prominin 2                                                  |
| hsa-miR-762 | ESPN     | espin                                                       |
| hsa-miR-762 | ADAMTSL3 | ADAMTS like 3                                               |
| hsa-miR-762 | PLEC     | plectin                                                     |
| hsa-miR-762 | GPSM3    | G protein signaling modulator 3                             |
| hsa-miR-762 | POLR2D   | RNA polymerase II subunit D                                 |
| hsa-miR-762 | THRA     | thyroid hormone receptor alpha                              |
| hsa-miR-762 | FMNL1    | formin like 1                                               |
| hsa-miR-762 | CRABP2   | cellular retinoic acid binding protein 2                    |
| hsa-miR-762 | CEP170B  | centrosomal protein 170B                                    |
| hsa-miR-762 | PAK4     | p21 (RAC1) activated kinase 4                               |
| hsa-miR-762 | ABR      | ABR, RhoGEF and GTPase activating protein                   |
| hsa-miR-762 | KREMEN1  | kringle containing transmembrane protein 1                  |
| hsa-miR-762 | TMEM54   | transmembrane protein 54                                    |
| hsa-miR-762 | KLF16    | Kruppel like factor 16                                      |
| hsa-miR-762 | PRELID1  | PRELI domain containing 1                                   |
| hsa-miR-762 | SAMD4B   | sterile alpha motif domain containing 4B                    |
| hsa-miR-762 | CPLX3    | complexin 3                                                 |
| hsa-miR-762 | TYK2     | tyrosine kinase 2                                           |
| hsa-miR-762 | MAPKAPK3 | mitogen-activated protein kinase-activated protein kinase 3 |
| hsa-miR-762 | G6PD     | glucose-6-phosphate dehydrogenase                           |
| hsa-miR-762 | CARNS1   | carnosine synthase 1                                        |
| hsa-miR-762 | RUFY4    | RUN and FYVE domain containing 4                            |
| hsa-miR-762 | SLK      | STE20 like kinase                                           |
| hsa-miR-762 | CX3CL1   | C-X3-C motif chemokine ligand 1                             |
| hsa-miR-762 | SUV39H1  | suppressor of variegation 3-9 homolog 1                     |
| hsa-miR-762 | TRAM2    | translocation associated membrane protein 2                 |
| hsa-miR-762 | CHD5     | chromodomain helicase DNA binding protein 5                 |
| hsa-miR-762 | ADD1     | adducin 1                                                   |
| hsa-miR-762 | MRTO4    | MRT4 homolog, ribosome maturation factor                    |
| hsa-miR-762 | NDUFA4L2 | NDUFA4, mitochondrial complex associated like 2             |
| hsa-miR-762 | N4BP3    | NEDD4 binding protein 3                                     |
| hsa-miR-762 | KRT5     | keratin 5                                                   |
| hsa-miR-762 | TGFBR3   | transforming growth factor beta receptor 3                  |
| hsa-miR-762 | ZNF618   | zinc finger protein 618                                     |



|             |          |                                                                |
|-------------|----------|----------------------------------------------------------------|
| hsa-miR-762 | ZMIZ1    | zinc finger MIZ-type containing 1                              |
| hsa-miR-762 | FBXO31   | F-box protein 31                                               |
| hsa-miR-762 | TPD52L1  | TPD52 like 1                                                   |
| hsa-miR-762 | CMTM4    | CKLF like MARVEL transmembrane domain containing 4             |
| hsa-miR-762 | ZBTB2    | zinc finger and BTB domain containing 2                        |
| hsa-miR-762 | PYGM     | glycogen phosphorylase, muscle associated                      |
| hsa-miR-762 | EMP2     | epithelial membrane protein 2                                  |
| hsa-miR-762 | PPME1    | protein phosphatase methylesterase 1                           |
| hsa-miR-762 | NF2      | neurofibromin 2                                                |
| hsa-miR-762 | HPCAL4   | hippocalcin like 4                                             |
| hsa-miR-762 | C22orf23 | chromosome 22 open reading frame 23                            |
| hsa-miR-762 | SUFU     | SUFU negative regulator of hedgehog signaling                  |
| hsa-miR-762 | ERMAP    | erythroblast membrane associated protein (Scianna blood group) |
| hsa-miR-762 | SPRN     | shadow of prion protein                                        |
| hsa-miR-762 | IRF2BP1  | interferon regulatory factor 2 binding protein 1               |
| hsa-miR-762 | ZC3H7B   | zinc finger CCCH-type containing 7B                            |
| hsa-miR-762 | TEX264   | testis expressed 264                                           |
| hsa-miR-762 | MICB     | MHC class I polypeptide-related sequence B                     |
| hsa-miR-762 | CYB5R3   | cytochrome b5 reductase 3                                      |
| hsa-miR-762 | CINP     | cyclin dependent kinase 2 interacting protein                  |
| hsa-miR-762 | ERF      | ETS2 repressor factor                                          |
| hsa-miR-762 | WDR18    | WD repeat domain 18                                            |
| hsa-miR-762 | KMT2B    | lysine methyltransferase 2B                                    |
| hsa-miR-762 | CPTP     | ceramide-1-phosphate transfer protein                          |
| hsa-miR-762 | TCP10L   | t-complex 10 like                                              |
| hsa-miR-762 | GOLGA3   | golgin A3                                                      |
| hsa-miR-762 | MAX      | MYC associated factor X                                        |
| hsa-miR-762 | FAIM2    | Fas apoptotic inhibitory molecule 2                            |
| hsa-miR-762 | GIT1     | GIT ArfGAP 1                                                   |
| hsa-miR-762 | ACP2     | acid phosphatase 2, lysosomal                                  |
| hsa-miR-762 | CLPTM1   | CLPTM1, transmembrane protein                                  |
| hsa-miR-762 | FAM163A  | family with sequence similarity 163 member A                   |
| hsa-miR-762 | FGF19    | fibroblast growth factor 19                                    |
| hsa-miR-762 | COMT     | catechol-O-methyltransferase                                   |
| hsa-miR-762 | SCG5     | secretogranin V                                                |
| hsa-miR-762 | CCL1     | C-C motif chemokine ligand 1                                   |
| hsa-miR-762 | HES6     | hes family bHLH transcription factor 6                         |
| hsa-miR-762 | FAM86B1  | family with sequence similarity 86 member B1                   |
| hsa-miR-762 | TMEM105  | TMEM105 long non-coding RNA                                    |
| hsa-miR-762 | BRAT1    | BRCA1 associated ATM activator 1                               |
| hsa-miR-762 | KCMF1    | potassium channel modulatory factor 1                          |
| hsa-miR-762 | PLCD3    | phospholipase C delta 3                                        |
| hsa-miR-762 | AKT1S1   | AKT1 substrate 1                                               |
| hsa-miR-762 | PPP2R5E  | protein phosphatase 2 regulatory subunit B'epsilon             |

|             |          |                                                                          |
|-------------|----------|--------------------------------------------------------------------------|
| hsa-miR-762 | ZNF454   | zinc finger protein 454                                                  |
| hsa-miR-762 | ENTPD2   | ectonucleoside triphosphate diphosphohydrolase 2                         |
| hsa-miR-762 | PIK3R6   | phosphoinositide-3-kinase regulatory subunit 6                           |
| hsa-miR-762 | ARHGAP4  | Rho GTPase activating protein 4                                          |
| hsa-miR-762 | NFASC    | neurofascin                                                              |
| hsa-miR-762 | COX10    | cytochrome c oxidase assembly factor heme A:farnesyltransferase<br>COX10 |
| hsa-miR-762 | MVB12B   | multivesicular body subunit 12B                                          |
| hsa-miR-762 | EEF2KMT  | eukaryotic elongation factor 2 lysine methyltransferase                  |
| hsa-miR-762 | SRRM4    | serine/arginine repetitive matrix 4                                      |
| hsa-miR-762 | TNFAIP1  | TNF alpha induced protein 1                                              |
| hsa-miR-762 | SLC35E4  | solute carrier family 35 member E4                                       |
| hsa-miR-762 | UPF2     | UPF2, regulator of nonsense mediated mRNA decay                          |
| hsa-miR-762 | TBC1D16  | TBC1 domain family member 16                                             |
| hsa-miR-762 | ALDH4A1  | aldehyde dehydrogenase 4 family member A1                                |
| hsa-miR-762 | NANOS2   | nanos C2HC-type zinc finger 2                                            |
| hsa-miR-762 | NT5DC3   | 5'-nucleotidase domain containing 3                                      |
| hsa-miR-762 | VSIR     | V-set immunoregulatory receptor                                          |
| hsa-miR-762 | ZDHHC3   | zinc finger DHHC-type containing 3                                       |
| hsa-miR-762 | SPOP     | speckle type BTB/POZ protein                                             |
| hsa-miR-762 | ABCB8    | ATP binding cassette subfamily B member 8                                |
| hsa-miR-762 | EDAR     | ectodysplasin A receptor                                                 |
| hsa-miR-762 | MGLL     | monoglyceride lipase                                                     |
| hsa-miR-762 | CABP7    | calcium binding protein 7                                                |
| hsa-miR-762 | PRXL2B   | peroxiredoxin like 2B                                                    |
| hsa-miR-762 | RASD2    | RASD family member 2                                                     |
| hsa-miR-762 | HOXA11   | homeobox A11                                                             |
| hsa-miR-762 | MANEAL   | mannosidase endo-alpha like                                              |
| hsa-miR-762 | SCUBE1   | signal peptide, CUB domain and EGF like domain containing 1              |
| hsa-miR-762 | RHOQ     | ras homolog family member Q                                              |
| hsa-miR-762 | BEAN1    | brain expressed associated with NEDD4 1                                  |
| hsa-miR-762 | TXLNG    | taxilin gamma                                                            |
| hsa-miR-762 | FAM86C1  | family with sequence similarity 86 member C1                             |
| hsa-miR-762 | PES1     | pescadillo ribosomal biogenesis factor 1                                 |
| hsa-miR-762 | MARVELD1 | MARVEL domain containing 1                                               |
| hsa-miR-762 | TMEM95   | transmembrane protein 95                                                 |
| hsa-miR-762 | THPO     | thrombopoietin                                                           |
| hsa-miR-762 | BICDL1   | BICD family like cargo adaptor 1                                         |
| hsa-miR-762 | RNF38    | ring finger protein 38                                                   |
| hsa-miR-762 | NGFR     | nerve growth factor receptor                                             |
| hsa-miR-762 | PRCC     | proline rich mitotic checkpoint control factor                           |
| hsa-miR-762 | SDK1     | sidekick cell adhesion molecule 1                                        |
| hsa-miR-762 | TOB2     | transducer of ERBB2, 2                                                   |
| hsa-miR-762 | TRIM62   | tripartite motif containing 62                                           |

|             |          |                                                        |
|-------------|----------|--------------------------------------------------------|
| hsa-miR-762 | DNAJC30  | DnaJ heat shock protein family (Hsp40) member C30      |
| hsa-miR-762 | RIMS4    | regulating synaptic membrane exocytosis 4              |
| hsa-miR-762 | SEMA4G   | semaphorin 4G                                          |
| hsa-miR-762 | ARMC9    | armadillo repeat containing 9                          |
| hsa-miR-762 | NMT2     | N-myristoyltransferase 2                               |
| hsa-miR-762 | SLC25A19 | solute carrier family 25 member 19                     |
| hsa-miR-762 | SMYD5    | SMYD family member 5                                   |
| hsa-miR-762 | BBS10    | Bardet-Biedl syndrome 10                               |
| hsa-miR-762 | ACSF3    | acyl-CoA synthetase family member 3                    |
| hsa-miR-762 | CAMKK2   | calcium/calmodulin dependent protein kinase kinase 2   |
| hsa-miR-762 | DCAF7    | DDB1 and CUL4 associated factor 7                      |
| hsa-miR-762 | OGG1     | 8-oxoguanine DNA glycosylase                           |
| hsa-miR-762 | IFNLR1   | interferon lambda receptor 1                           |
| hsa-miR-762 | FOSL1    | FOS like 1, AP-1 transcription factor subunit          |
| hsa-miR-762 | CADM3    | cell adhesion molecule 3                               |
| hsa-miR-762 | TAB2     | TGF-beta activated kinase 1 (MAP3K7) binding protein 2 |
| hsa-miR-762 | DNASE1L1 | deoxyribonuclease 1 like 1                             |
| hsa-miR-762 | TOM1L2   | target of myb1 like 2 membrane trafficking protein     |
| hsa-miR-762 | TEAD1    | TEA domain transcription factor 1                      |
| hsa-miR-762 | EEF2K    | eukaryotic elongation factor 2 kinase                  |
| hsa-miR-762 | WWC2     | WW and C2 domain containing 2                          |
| hsa-miR-762 | PLXNA4   | plexin A4                                              |
| hsa-miR-762 | SLC35A4  | solute carrier family 35 member A4                     |
| hsa-miR-762 | TMEM222  | transmembrane protein 222                              |
| hsa-miR-762 | GAS8     | growth arrest specific 8                               |
| hsa-miR-762 | CNTNAP5  | contactin associated protein like 5                    |
| hsa-miR-762 | KCNC1    | potassium voltage-gated channel subfamily C member 1   |
| hsa-miR-762 | CDKAL1   | CDK5 regulatory subunit associated protein 1 like 1    |
| hsa-miR-762 | NKD1     | NKD1, WNT signaling pathway inhibitor                  |
| hsa-miR-762 | KIF23    | kinesin family member 23                               |
| hsa-miR-762 | NCKAP5L  | NCK associated protein 5 like                          |
| hsa-miR-762 | GNAO1    | G protein subunit alpha o1                             |
| hsa-miR-762 | COL1A1   | collagen type I alpha 1 chain                          |
| hsa-miR-762 | TCF7L1   | transcription factor 7 like 1                          |
| hsa-miR-762 | DDR1     | discoidin domain receptor tyrosine kinase 1            |
| hsa-miR-762 | SH2B1    | SH2B adaptor protein 1                                 |
| hsa-miR-762 | CCDC65   | coiled-coil domain containing 65                       |
| hsa-miR-762 | MAMLD1   | mastermind like domain containing 1                    |
| hsa-miR-762 | CABLES1  | Cdk5 and Abl enzyme substrate 1                        |
| hsa-miR-762 | FSTL3    | folliculin like 3                                      |
| hsa-miR-762 | CYGB     | cytoglobin                                             |
| hsa-miR-762 | CTDP1    | CTD phosphatase subunit 1                              |
| hsa-miR-762 | ZDHC8    | zinc finger DHHC-type containing 8                     |
| hsa-miR-762 | MAF1     | MAF1 homolog, negative regulator of RNA polymerase III |

|             |           |                                                                  |
|-------------|-----------|------------------------------------------------------------------|
| hsa-miR-762 | PRKACG    | protein kinase cAMP-activated catalytic subunit gamma            |
| hsa-miR-762 | PIK3R5    | phosphoinositide-3-kinase regulatory subunit 5                   |
| hsa-miR-762 | DAG1      | dystroglycan 1                                                   |
| hsa-miR-762 | SPTB      | spectrin beta, erythrocytic                                      |
| hsa-miR-762 | CHRNA4    | cholinergic receptor nicotinic alpha 4 subunit                   |
| hsa-miR-762 | SLC6A6    | solute carrier family 6 member 6                                 |
| hsa-miR-762 | TRABD     | TraB domain containing                                           |
| hsa-miR-762 | METAP1D   | methionyl aminopeptidase type 1D, mitochondrial                  |
| hsa-miR-762 | STPG1     | sperm tail PG-rich repeat containing 1                           |
| hsa-miR-762 | DBF4B     | DBF4 zinc finger B                                               |
| hsa-miR-762 | HIPK2     | homeodomain interacting protein kinase 2                         |
| hsa-miR-762 | ARC       | activity regulated cytoskeleton associated protein               |
| hsa-miR-762 | CDK11A    | cyclin dependent kinase 11A                                      |
| hsa-miR-762 | KCNG1     | potassium voltage-gated channel modifier subfamily G member 1    |
| hsa-miR-762 | PRDM11    | PR/SET domain 11                                                 |
| hsa-miR-762 | GIN1      | gypsy retrotransposon integrase 1                                |
| hsa-miR-762 | ZMIZ2     | zinc finger MIZ-type containing 2                                |
| hsa-miR-762 | SARM1     | sterile alpha and TIR motif containing 1                         |
| hsa-miR-762 | SIPA1L3   | signal induced proliferation associated 1 like 3                 |
| hsa-miR-762 | C16orf45  | chromosome 16 open reading frame 45                              |
| hsa-miR-762 | ATG9A     | autophagy related 9A                                             |
| hsa-miR-762 | C17orf107 | chromosome 17 open reading frame 107                             |
| hsa-miR-762 | NR6A1     | nuclear receptor subfamily 6 group A member 1                    |
| hsa-miR-762 | SRD5A1    | steroid 5 alpha-reductase 1                                      |
| hsa-miR-762 | ZNF180    | zinc finger protein 180                                          |
| hsa-miR-762 | ERCC2     | ERCC excision repair 2, TFIIH core complex helicase subunit      |
| hsa-miR-762 | ALX4      | ALX homeobox 4                                                   |
| hsa-miR-762 | PMF1      | polyamine modulated factor 1                                     |
| hsa-miR-762 | RAB15     | RAB15, member RAS oncogene family                                |
| hsa-miR-762 | ST3GAL3   | ST3 beta-galactoside alpha-2,3-sialyltransferase 3               |
| hsa-miR-762 | CYFIP2    | cytoplasmic FMR1 interacting protein 2                           |
| hsa-miR-762 | MOCS1     | molybdenum cofactor synthesis 1                                  |
| hsa-miR-762 | PARP3     | poly(ADP-ribose) polymerase family member 3                      |
| hsa-miR-762 | COTL1     | coactosin like F-actin binding protein 1                         |
| hsa-miR-762 | LAD1      | ladinin 1                                                        |
| hsa-miR-762 | GRK6      | G protein-coupled receptor kinase 6                              |
| hsa-miR-762 | JADE2     | jade family PHD finger 2                                         |
| hsa-miR-762 | OSER1     | oxidative stress responsive serine rich 1                        |
| hsa-miR-762 | KAZALD1   | Kazal type serine peptidase inhibitor domain 1                   |
| hsa-miR-762 | DUSP8     | dual specificity phosphatase 8                                   |
| hsa-miR-762 | SFXN5     | sideroflexin 5                                                   |
| hsa-miR-762 | AGAP2     | ArfGAP with GTPase domain, ankyrin repeat and PH domain 2        |
| hsa-miR-762 | KCNE3     | potassium voltage-gated channel subfamily E regulatory subunit 3 |
| hsa-miR-762 | CNOT1     | CCR4-NOT transcription complex subunit 1                         |

|             |          |                                                             |
|-------------|----------|-------------------------------------------------------------|
| hsa-miR-762 | TRIM44   | tripartite motif containing 44                              |
| hsa-miR-762 | SYT12    | synaptotagmin 12                                            |
| hsa-miR-762 | PIP5K1C  | phosphatidylinositol-4-phosphate 5-kinase type 1 gamma      |
| hsa-miR-762 | HOXB1    | homeobox B1                                                 |
| hsa-miR-762 | GPR39    | G protein-coupled receptor 39                               |
| hsa-miR-762 | CYTH4    | cytohesin 4                                                 |
| hsa-miR-762 | LY6G5C   | lymphocyte antigen 6 family member G5C                      |
| hsa-miR-762 | URM1     | ubiquitin related modifier 1                                |
| hsa-miR-762 | CLEC4G   | C-type lectin domain family 4 member G                      |
| hsa-miR-762 | NPC1L1   | NPC1 like intracellular cholesterol transporter 1           |
| hsa-miR-762 | FAM104A  | family with sequence similarity 104 member A                |
| hsa-miR-762 | ARHGEF39 | Rho guanine nucleotide exchange factor 39                   |
| hsa-miR-762 | ZNF345   | zinc finger protein 345                                     |
| hsa-miR-762 | IGLL1    | immunoglobulin lambda like polypeptide 1                    |
| hsa-miR-762 | BOD1L1   | biorientation of chromosomes in cell division 1 like 1      |
| hsa-miR-762 | HDAC6    | histone deacetylase 6                                       |
| hsa-miR-762 | WDTC1    | WD and tetratricopeptide repeats 1                          |
| hsa-miR-762 | NPEPL1   | aminopeptidase like 1                                       |
| hsa-miR-762 | KDM6B    | lysine demethylase 6B                                       |
| hsa-miR-762 | NDUFA11  | NADH:ubiquinone oxidoreductase subunit A11                  |
| hsa-miR-762 | FRMPD3   | FERM and PDZ domain containing 3                            |
| hsa-miR-762 | P2RY2    | purinergic receptor P2Y2                                    |
| hsa-miR-762 | SNPH     | syntrophin                                                  |
| hsa-miR-762 | CSF3R    | colony stimulating factor 3 receptor                        |
| hsa-miR-762 | TNS4     | tensin 4                                                    |
| hsa-miR-762 | OPN4     | opsin 4                                                     |
| hsa-miR-762 | LOXL2    | lysyl oxidase like 2                                        |
| hsa-miR-762 | JADE1    | jade family PHD finger 1                                    |
| hsa-miR-762 | CFAP44   | cilia and flagella associated protein 44                    |
| hsa-miR-762 | STC1     | stanniocalcin 1                                             |
| hsa-miR-762 | ANKS1B   | ankyrin repeat and sterile alpha motif domain containing 1B |
| hsa-miR-762 | RBPMS    | RNA binding protein, mRNA processing factor                 |
| hsa-miR-762 | AK1      | adenylate kinase 1                                          |
| hsa-miR-762 | BRK1     | BRICK1, SCAR/WAVE actin nucleating complex subunit          |
| hsa-miR-762 | MYRF     | myelin regulatory factor                                    |
| hsa-miR-762 | ARVCF    | ARVCF, delta catenin family member                          |
| hsa-miR-762 | TBC1D24  | TBC1 domain family member 24                                |
| hsa-miR-762 | GPR173   | G protein-coupled receptor 173                              |
| hsa-miR-762 | TJAP1    | tight junction associated protein 1                         |
| hsa-miR-762 | TRAF6    | TNF receptor associated factor 6                            |
| hsa-miR-762 | SLC39A3  | solute carrier family 39 member 3                           |
| hsa-miR-762 | IL17C    | interleukin 17C                                             |
| hsa-miR-762 | ANKS3    | ankyrin repeat and sterile alpha motif domain containing 3  |
| hsa-miR-762 | ASB6     | ankyrin repeat and SOCS box containing 6                    |

|             |           |                                                                           |
|-------------|-----------|---------------------------------------------------------------------------|
| hsa-miR-762 | XKR4      | XK related 4                                                              |
| hsa-miR-762 | ZER1      | zyg-11 related cell cycle regulator                                       |
| hsa-miR-762 | PREPL     | prolyl endopeptidase like                                                 |
| hsa-miR-762 | LRRC1     | leucine rich repeat containing 1                                          |
| hsa-miR-762 | PROSER3   | proline and serine rich 3                                                 |
| hsa-miR-762 | PLAGL2    | PLAG1 like zinc finger 2                                                  |
| hsa-miR-762 | NME4      | NME/NM23 nucleoside diphosphate kinase 4                                  |
| hsa-miR-762 | GIT2      | GIT ArfGAP 2                                                              |
| hsa-miR-762 | POLDIP2   | DNA polymerase delta interacting protein 2                                |
| hsa-miR-762 | ZNF629    | zinc finger protein 629                                                   |
| hsa-miR-762 | FOKK1     | forkhead box K1                                                           |
| hsa-miR-762 | ATP2A2    | ATPase sarcoplasmic/endoplasmic reticulum Ca <sup>2+</sup> transporting 2 |
| hsa-miR-762 | AQP2      | aquaporin 2                                                               |
| hsa-miR-762 | NKG7      | natural killer cell granule protein 7                                     |
| hsa-miR-762 | TNFAIP8L2 | TNF alpha induced protein 8 like 2                                        |
| hsa-miR-762 | TRARG1    | trafficking regulator of GLUT4 (SLC2A4) 1                                 |
| hsa-miR-762 | PPARD     | peroxisome proliferator activated receptor delta                          |
| hsa-miR-762 | RAVER1    | ribonucleoprotein, PTB binding 1                                          |
| hsa-miR-762 | TRAIP     | TRAF interacting protein                                                  |
| hsa-miR-762 | KRTAP10-9 | keratin associated protein 10-9                                           |
| hsa-miR-762 | RGSL1     | regulator of G protein signaling like 1                                   |
| hsa-miR-762 | SLC9B2    | solute carrier family 9 member B2                                         |
| hsa-miR-762 | VGF       | VGF nerve growth factor inducible                                         |
| hsa-miR-762 | NEMP2     | nuclear envelope integral membrane protein 2                              |
| hsa-miR-762 | AMACR     | alpha-methylacyl-CoA racemase                                             |
| hsa-miR-762 | GPR107    | G protein-coupled receptor 107                                            |
| hsa-miR-762 | NCLN      | nicalin                                                                   |
| hsa-miR-762 | CMKLR1    | chemerin chemokine-like receptor 1                                        |
| hsa-miR-762 | SOX7      | SRY-box 7                                                                 |
| hsa-miR-762 | VAV2      | vav guanine nucleotide exchange factor 2                                  |
| hsa-miR-762 | KPNA6     | karyopherin subunit alpha 6                                               |
| hsa-miR-762 | NR1H2     | nuclear receptor subfamily 1 group H member 2                             |
| hsa-miR-762 | NR2C2     | nuclear receptor subfamily 2 group C member 2                             |
| hsa-miR-762 | CREB3L1   | cAMP responsive element binding protein 3 like 1                          |
| hsa-miR-762 | ALDH3B1   | aldehyde dehydrogenase 3 family member B1                                 |
| hsa-miR-762 | SEMA4C    | semaphorin 4C                                                             |
| hsa-miR-762 | SGSM2     | small G protein signaling modulator 2                                     |
| hsa-miR-762 | EFNA3     | ephrin A3                                                                 |
| hsa-miR-762 | CBFA2T3   | CBFA2/RUNX1 translocation partner 3                                       |
| hsa-miR-762 | KRTAP10-2 | keratin associated protein 10-2                                           |
| hsa-miR-762 | NUDT8     | nudix hydrolase 8                                                         |
| hsa-miR-762 | ISM2      | isthmin 2                                                                 |
| hsa-miR-762 | ZBTB7C    | zinc finger and BTB domain containing 7C                                  |
| hsa-miR-762 | POM121    | POM121 transmembrane nucleoporin                                          |

|             |              |                                                                                                   |
|-------------|--------------|---------------------------------------------------------------------------------------------------|
| hsa-miR-762 | ELAVL3       | ELAV like RNA binding protein 3                                                                   |
| hsa-miR-762 | BMP8B        | bone morphogenetic protein 8b                                                                     |
| hsa-miR-762 | CALM3        | calmodulin 3                                                                                      |
| hsa-miR-762 | NOVA2        | NOVA alternative splicing regulator 2                                                             |
| hsa-miR-762 | UBAP1        | ubiquitin associated protein 1                                                                    |
| hsa-miR-762 | GTF2H5       | general transcription factor IIH subunit 5                                                        |
| hsa-miR-762 | NTN1         | netrin 1                                                                                          |
| hsa-miR-762 | CTNS         | cystinosis, lysosomal cystine transporter                                                         |
| hsa-miR-762 | SLC43A2      | solute carrier family 43 member 2                                                                 |
| hsa-miR-762 | SPSB1        | splA/ryanodine receptor domain and SOCS box containing 1                                          |
| hsa-miR-762 | SMARCD2      | SWI/SNF related, matrix associated, actin dependent regulator of chromatin, subfamily d, member 2 |
| hsa-miR-762 | PANX2        | pannexin 2                                                                                        |
| hsa-miR-762 | HLA-DRA      | major histocompatibility complex, class II, DR alpha                                              |
| hsa-miR-762 | LCN1         | lipocalin 1                                                                                       |
| hsa-miR-762 | SBK1         | SH3 domain binding kinase 1                                                                       |
| hsa-miR-762 | AAK1         | AP2 associated kinase 1                                                                           |
| hsa-miR-762 | MXD3         | MAX dimerization protein 3                                                                        |
| hsa-miR-762 | LMX1B        | LIM homeobox transcription factor 1 beta                                                          |
| hsa-miR-762 | PLA2G2F      | phospholipase A2 group IIF                                                                        |
| hsa-miR-762 | PRKAR2A      | protein kinase cAMP-dependent type II regulatory subunit alpha                                    |
| hsa-miR-762 | LRRC75A      | leucine rich repeat containing 75A                                                                |
| hsa-miR-762 | ADGRF3       | adhesion G protein-coupled receptor F3                                                            |
| hsa-miR-762 | DIDO1        | death inducer-obliterator 1                                                                       |
| hsa-miR-762 | PKP1         | plakophilin 1                                                                                     |
| hsa-miR-762 | JMJD4        | jumonji domain containing 4                                                                       |
| hsa-miR-762 | FAM117A      | family with sequence similarity 117 member A                                                      |
| hsa-miR-762 | CES3         | carboxylesterase 3                                                                                |
| hsa-miR-762 | TFE3         | transcription factor binding to IGHM enhancer 3                                                   |
| hsa-miR-762 | PACSIN1      | protein kinase C and casein kinase substrate in neurons 1                                         |
| hsa-miR-762 | EXOC7        | exocyst complex component 7                                                                       |
| hsa-miR-762 | CUX1         | cut like homeobox 1                                                                               |
| hsa-miR-762 | CCL28        | C-C motif chemokine ligand 28                                                                     |
| hsa-miR-762 | CTDSP1       | CTD small phosphatase 1                                                                           |
| hsa-miR-762 | LYNX1-SLURP2 | LYNX1-SLURP2 readthrough                                                                          |
| hsa-miR-762 | TTC7B        | tetratricopeptide repeat domain 7B                                                                |
| hsa-miR-762 | FAM78A       | family with sequence similarity 78 member A                                                       |
| hsa-miR-762 | WBP2         | WW domain binding protein 2                                                                       |
| hsa-miR-762 | C11orf21     | chromosome 11 open reading frame 21                                                               |
| hsa-miR-762 | MAN1C1       | mannosidase alpha class 1C member 1                                                               |
| hsa-miR-762 | CCDC177      | coiled-coil domain containing 177                                                                 |
| hsa-miR-762 | PRRC2B       | proline rich coiled-coil 2B                                                                       |
| hsa-miR-762 | GDI1         | GDP dissociation inhibitor 1                                                                      |
| hsa-miR-762 | AGRN         | agrin                                                                                             |

|             |          |                                                          |
|-------------|----------|----------------------------------------------------------|
| hsa-miR-762 | CCDC103  | coiled-coil domain containing 103                        |
| hsa-miR-762 | SLC44A2  | solute carrier family 44 member 2                        |
| hsa-miR-762 | WASF2    | WAS protein family member 2                              |
| hsa-miR-762 | TSPAN11  | tetraspanin 11                                           |
| hsa-miR-762 | LRRC32   | leucine rich repeat containing 32                        |
| hsa-miR-762 | SLURP2   | secreted LY6/PLAUR domain containing 2                   |
| hsa-miR-762 | TRIM58   | tripartite motif containing 58                           |
| hsa-miR-762 | CACNA1A  | calcium voltage-gated channel subunit alpha1 A           |
| hsa-miR-762 | NTRK3    | neurotrophic receptor tyrosine kinase 3                  |
| hsa-miR-762 | RAB11B   | RAB11B, member RAS oncogene family                       |
| hsa-miR-762 | CSF1     | colony stimulating factor 1                              |
| hsa-miR-762 | ARHGAP39 | Rho GTPase activating protein 39                         |
| hsa-miR-762 | CRYBG2   | crystallin beta-gamma domain containing 2                |
| hsa-miR-762 | C1QL1    | complement C1q like 1                                    |
| hsa-miR-762 | DUSP15   | dual specificity phosphatase 15                          |
| hsa-miR-762 | NPTXR    | neuronal pentraxin receptor                              |
| hsa-miR-762 | XIRP1    | xin actin binding repeat containing 1                    |
| hsa-miR-762 | PALM2    | paralemmin 2                                             |
| hsa-miR-762 | MAPK8IP3 | mitogen-activated protein kinase 8 interacting protein 3 |
| hsa-miR-762 | TNNI1    | troponin I1, slow skeletal type                          |
| hsa-miR-762 | OPTC     | opticin                                                  |
| hsa-miR-762 | TMEM9    | transmembrane protein 9                                  |
| hsa-miR-762 | WWP2     | WW domain containing E3 ubiquitin protein ligase 2       |
| hsa-miR-762 | PLEKHM3  | pleckstrin homology domain containing M3                 |
| hsa-miR-762 | DPY19L2  | dpy-19 like 2                                            |
| hsa-miR-762 | ZNRF3    | zinc and ring finger 3                                   |
| hsa-miR-762 | LRRC14   | leucine rich repeat containing 14                        |
| hsa-miR-762 | ZC3H12D  | zinc finger CCCH-type containing 12D                     |
| hsa-miR-762 | SHANK3   | SH3 and multiple ankyrin repeat domains 3                |
| hsa-miR-762 | MGRN1    | mahogunin ring finger 1                                  |
| hsa-miR-762 | P4HB     | prolyl 4-hydroxylase subunit beta                        |
| hsa-miR-762 | SLA2     | Src like adaptor 2                                       |
| hsa-miR-762 | SLC25A23 | solute carrier family 25 member 23                       |
| hsa-miR-762 | CDCP1    | CUB domain containing protein 1                          |
| hsa-miR-762 | PTTG1IP  | PTTG1 interacting protein                                |
| hsa-miR-762 | AGPAT3   | 1-acylglycerol-3-phosphate O-acyltransferase 3           |
| hsa-miR-762 | SLC5A5   | solute carrier family 5 member 5                         |
| hsa-miR-762 | IQSEC3   | IQ motif and Sec7 domain 3                               |
| hsa-miR-762 | SOCS7    | suppressor of cytokine signaling 7                       |
| hsa-miR-762 | ASPH     | aspartate beta-hydroxylase                               |
| hsa-miR-762 | CHMP7    | charged multivesicular body protein 7                    |
| hsa-miR-762 | L1CAM    | L1 cell adhesion molecule                                |
| hsa-miR-762 | TET3     | tet methylcytosine dioxygenase 3                         |
| hsa-miR-762 | NPY      | neuropeptide Y                                           |



|             |          |                                                                      |
|-------------|----------|----------------------------------------------------------------------|
| hsa-miR-762 | DPYSL5   | dihydropyrimidinase like 5                                           |
| hsa-miR-762 | CACTIN   | cactin, spliceosome C complex subunit                                |
| hsa-miR-762 | PFKL     | phosphofructokinase, liver type                                      |
| hsa-miR-762 | PLCH2    | phospholipase C eta 2                                                |
| hsa-miR-762 | BTRC     | beta-transducin repeat containing E3 ubiquitin protein ligase        |
| hsa-miR-762 | WIPF2    | WAS/WASL interacting protein family member 2                         |
| hsa-miR-762 | TMEM150A | transmembrane protein 150A                                           |
| hsa-miR-762 | YIF1B    | Yip1 interacting factor homolog B, membrane trafficking protein      |
| hsa-miR-762 | RPP14    | ribonuclease P/MRP subunit p14                                       |
| hsa-miR-762 | PLEKHO2  | pleckstrin homology domain containing O2                             |
| hsa-miR-762 | IGLL5    | immunoglobulin lambda like polypeptide 5                             |
| hsa-miR-762 | SLC29A3  | solute carrier family 29 member 3                                    |
| hsa-miR-762 | SERF2    | small EDRK-rich factor 2                                             |
| hsa-miR-762 | SHISA7   | shisa family member 7                                                |
| hsa-miR-762 | NDOR1    | NADPH dependent diflavin oxidoreductase 1                            |
| hsa-miR-762 | GRINA    | glutamate ionotropic receptor NMDA type subunit associated protein 1 |
| hsa-miR-762 | CDK16    | cyclin dependent kinase 16                                           |
| hsa-miR-762 | SLC1A2   | solute carrier family 1 member 2                                     |
| hsa-miR-762 | RAD54L2  | RAD54 like 2                                                         |
| hsa-miR-762 | C3orf20  | chromosome 3 open reading frame 20                                   |
| hsa-miR-762 | RGMA     | repulsive guidance molecule BMP co-receptor a                        |
| hsa-miR-762 | CCDC85C  | coiled-coil domain containing 85C                                    |
| hsa-miR-762 | SYT2     | synaptotagmin 2                                                      |
| hsa-miR-762 | SHISA6   | shisa family member 6                                                |
| hsa-miR-762 | EIF4E2   | eukaryotic translation initiation factor 4E family member 2          |
| hsa-miR-762 | PNKD     | PNKD, MBL domain containing                                          |
| hsa-miR-762 | TMPRSS6  | transmembrane serine protease 6                                      |
| hsa-miR-762 | CFAP410  | cilia and flagella associated protein 410                            |
| hsa-miR-762 | AGFG2    | ArfGAP with FG repeats 2                                             |
| hsa-miR-762 | SPINT1   | serine peptidase inhibitor, Kunitz type 1                            |
| hsa-miR-762 | EDF1     | endothelial differentiation related factor 1                         |
| hsa-miR-762 | ACBD3    | acyl-CoA binding domain containing 3                                 |
| hsa-miR-762 | TMEM92   | transmembrane protein 92                                             |
| hsa-miR-762 | ZNF513   | zinc finger protein 513                                              |
| hsa-miR-762 | BSDC1    | BSD domain containing 1                                              |
| hsa-miR-762 | SFTPB    | surfactant protein B                                                 |
| hsa-miR-762 | CATSPERZ | catsper channel auxiliary subunit zeta                               |
| hsa-miR-762 | ZNF821   | zinc finger protein 821                                              |
| hsa-miR-762 | EFHD2    | EF-hand domain family member D2                                      |
| hsa-miR-762 | PER1     | period circadian regulator 1                                         |
| hsa-miR-762 | KCTD10   | potassium channel tetramerization domain containing 10               |
| hsa-miR-762 | MEX3A    | mex-3 RNA binding family member A                                    |
| hsa-miR-762 | ALDH3B2  | aldehyde dehydrogenase 3 family member B2                            |
| hsa-miR-762 | NUBP2    | nucleotide binding protein 2                                         |

|             |           |                                                                             |
|-------------|-----------|-----------------------------------------------------------------------------|
| hsa-miR-762 | PAX2      | paired box 2                                                                |
| hsa-miR-762 | FOXP4     | forkhead box P4                                                             |
| hsa-miR-762 | ANPEP     | alanyl aminopeptidase, membrane                                             |
| hsa-miR-762 | FBXW8     | F-box and WD repeat domain containing 8                                     |
| hsa-miR-762 | ERI3      | ERI1 exoribonuclease family member 3                                        |
| hsa-miR-762 | MFAP4     | microfibril associated protein 4                                            |
| hsa-miR-762 | ABTB1     | ankyrin repeat and BTB domain containing 1                                  |
| hsa-miR-762 | BAZ1B     | bromodomain adjacent to zinc finger domain 1B                               |
| hsa-miR-762 | SCAMP5    | secretory carrier membrane protein 5                                        |
| hsa-miR-762 | PCYT2     | phosphate cytidyltransferase 2, ethanolamine                                |
| hsa-miR-762 | GAB2      | GRB2 associated binding protein 2                                           |
| hsa-miR-762 | HNRNPUL1  | heterogeneous nuclear ribonucleoprotein U like 1                            |
| hsa-miR-762 | MSX1      | msh homeobox 1                                                              |
| hsa-miR-762 | RAB36     | RAB36, member RAS oncogene family                                           |
| hsa-miR-762 | CAPN5     | calpain 5                                                                   |
| hsa-miR-762 | LAMTOR4   | late endosomal/lysosomal adaptor, MAPK and MTOR activator 4                 |
| hsa-miR-762 | PTP4A3    | protein tyrosine phosphatase type IVA, member 3                             |
| hsa-miR-762 | AGAP1     | ArfGAP with GTPase domain, ankyrin repeat and PH domain 1                   |
| hsa-miR-762 | PFKFB4    | 6-phosphofructo-2-kinase/fructose-2,6-biphosphatase 4                       |
| hsa-miR-762 | MXD4      | MAX dimerization protein 4                                                  |
| hsa-miR-762 | C14orf132 | chromosome 14 open reading frame 132                                        |
| hsa-miR-762 | VASH1     | vasohibin 1                                                                 |
| hsa-miR-762 | LMF1      | lipase maturation factor 1                                                  |
| hsa-miR-762 | MORF4L2   | mortality factor 4 like 2                                                   |
| hsa-miR-762 | NCAPH2    | non-SMC condensin II complex subunit H2                                     |
| hsa-miR-762 | ITK       | IL2 inducible T cell kinase                                                 |
| hsa-miR-762 | DLK1      | delta like non-canonical Notch ligand 1                                     |
| hsa-miR-762 | IP6K1     | inositol hexakisphosphate kinase 1                                          |
| hsa-miR-762 | LYNX1     | Ly6/neurotoxin 1                                                            |
| hsa-miR-762 | DIPK1B    | divergent protein kinase domain 1B                                          |
| hsa-miR-762 | PADI2     | peptidyl arginine deiminase 2                                               |
| hsa-miR-762 | WHAMM     | WAS protein homolog associated with actin, golgi membranes and microtubules |
| hsa-miR-762 | GNAT1     | G protein subunit alpha transducin 1                                        |
| hsa-miR-762 | HAP1      | huntingtin associated protein 1                                             |
| hsa-miR-762 | TMEM43    | transmembrane protein 43                                                    |
| hsa-miR-762 | MMP14     | matrix metalloproteinase 14                                                 |
| hsa-miR-762 | TMEM63C   | transmembrane protein 63C                                                   |
| hsa-miR-762 | ST8SIA2   | ST8 alpha-N-acetyl-neuraminide alpha-2,8-sialyltransferase 2                |
| hsa-miR-762 | CYTH1     | cytohesin 1                                                                 |
| hsa-miR-762 | NXPH3     | neurexophilin 3                                                             |
| hsa-miR-762 | SND1      | staphylococcal nuclease and tudor domain containing 1                       |
| hsa-miR-762 | KCNB1     | potassium voltage-gated channel subfamily B member 1                        |
| hsa-miR-762 | IFNAR2    | interferon alpha and beta receptor subunit 2                                |

|             |          |                                                                         |
|-------------|----------|-------------------------------------------------------------------------|
| hsa-miR-762 | TMBIM1   | transmembrane BAX inhibitor motif containing 1                          |
| hsa-miR-762 | MSI1     | musashi RNA binding protein 1                                           |
| hsa-miR-762 | PAX8     | paired box 8                                                            |
| hsa-miR-762 | YPEL1    | yippee like 1                                                           |
| hsa-miR-762 | ANKRD33B | ankyrin repeat domain 33B                                               |
| hsa-miR-762 | ATG13    | autophagy related 13                                                    |
| hsa-miR-762 | USH1G    | USH1 protein network component sans                                     |
| hsa-miR-762 | FUT1     | fucosyltransferase 1 (H blood group)                                    |
| hsa-miR-762 | PCGF3    | polycomb group ring finger 3                                            |
| hsa-miR-762 | RGL2     | ral guanine nucleotide dissociation stimulator like 2                   |
| hsa-miR-762 | GRIP2    | glutamate receptor interacting protein 2                                |
| hsa-miR-762 | COL6A2   | collagen type VI alpha 2 chain                                          |
| hsa-miR-762 | CELF4    | CUGBP Elav-like family member 4                                         |
| hsa-miR-762 | STRN     | striatin                                                                |
| hsa-miR-762 | NFAM1    | NFAT activating protein with ITAM motif 1                               |
| hsa-miR-762 | TSPAN9   | tetraspanin 9                                                           |
| hsa-miR-762 | MYO1D    | myosin ID                                                               |
| hsa-miR-762 | SDHAF2   | succinate dehydrogenase complex assembly factor 2                       |
| hsa-miR-762 | ZNF548   | zinc finger protein 548                                                 |
| hsa-miR-762 | HOXD1    | homeobox D1                                                             |
| hsa-miR-762 | SEC14L5  | SEC14 like lipid binding 5                                              |
| hsa-miR-762 | PJA2     | praja ring finger ubiquitin ligase 2                                    |
| hsa-miR-762 | UBE2Q1   | ubiquitin conjugating enzyme E2 Q1                                      |
| hsa-miR-762 | DOCK5    | dedicator of cytokinesis 5                                              |
| hsa-miR-762 | KCNN1    | potassium calcium-activated channel subfamily N member 1                |
| hsa-miR-762 | ZNF132   | zinc finger protein 132                                                 |
| hsa-miR-762 | LDLRAD2  | low density lipoprotein receptor class A domain containing 2            |
| hsa-miR-762 | CNPY4    | canopy FGF signaling regulator 4                                        |
| hsa-miR-762 | STAT3    | signal transducer and activator of transcription 3                      |
| hsa-miR-762 | USF2     | upstream transcription factor 2, c-fos interacting                      |
| hsa-miR-762 | UAP1L1   | UDP-N-acetylglucosamine pyrophosphorylase 1 like 1                      |
| hsa-miR-762 | COL2A1   | collagen type II alpha 1 chain                                          |
| hsa-miR-762 | POM121C  | POM121 transmembrane nucleoporin C                                      |
| hsa-miR-762 | GATAD2A  | GATA zinc finger domain containing 2A                                   |
| hsa-miR-762 | TRH      | thyrotropin releasing hormone                                           |
| hsa-miR-762 | UBALD1   | UBA like domain containing 1                                            |
| hsa-miR-762 | PLA2G6   | phospholipase A2 group VI                                               |
| hsa-miR-762 | GPR156   | G protein-coupled receptor 156                                          |
| hsa-miR-762 | CA12     | carbonic anhydrase 12                                                   |
| hsa-miR-762 | MMAB     | metabolism of cobalamin associated B                                    |
| hsa-miR-762 | NPM2     | nucleophosmin/nucleoplasm 2                                             |
| hsa-miR-762 | PRKCA    | protein kinase C alpha                                                  |
| hsa-miR-762 | HCN4     | hyperpolarization activated cyclic nucleotide gated potassium channel 4 |
| hsa-miR-762 | ENOSF1   | enolase superfamily member 1                                            |

|             |          |                                                               |
|-------------|----------|---------------------------------------------------------------|
| hsa-miR-762 | NCK1     | NCK adaptor protein 1                                         |
| hsa-miR-762 | MNT      | MAX network transcriptional repressor                         |
| hsa-miR-762 | ECEL1    | endothelin converting enzyme like 1                           |
| hsa-miR-762 | ERG      | ETS transcription factor ERG                                  |
| hsa-miR-762 | ARHGEF4  | Rho guanine nucleotide exchange factor 4                      |
| hsa-miR-762 | FXN      | frataxin                                                      |
| hsa-miR-762 | KLK12    | kallikrein related peptidase 12                               |
| hsa-miR-762 | PPP4R1   | protein phosphatase 4 regulatory subunit 1                    |
| hsa-miR-762 | BOK      | BCL2 family apoptosis regulator BOK                           |
| hsa-miR-762 | UTP11    | UTP11, small subunit processome component                     |
| hsa-miR-762 | ADRA1A   | adrenoceptor alpha 1A                                         |
| hsa-miR-762 | CCNF     | cyclin F                                                      |
| hsa-miR-762 | BCL2L1   | BCL2 like 1                                                   |
| hsa-miR-762 | PRR3     | proline rich 3                                                |
| hsa-miR-762 | CLSTN1   | calsyntenin 1                                                 |
| hsa-miR-762 | RFNG     | RFNG O-fucosylpeptide 3-beta-N-acetylglucosaminyltransferase  |
| hsa-miR-762 | RALGDS   | ral guanine nucleotide dissociation stimulator                |
| hsa-miR-762 | SOCS3    | suppressor of cytokine signaling 3                            |
| hsa-miR-762 | AKT2     | AKT serine/threonine kinase 2                                 |
| hsa-miR-762 | SRGAP3   | SLIT-ROBO Rho GTPase activating protein 3                     |
| hsa-miR-762 | RNF170   | ring finger protein 170                                       |
| hsa-miR-762 | DHX8     | DEAH-box helicase 8                                           |
| hsa-miR-762 | TSPAN33  | tetraspanin 33                                                |
| hsa-miR-762 | SLC25A44 | solute carrier family 25 member 44                            |
| hsa-miR-762 | KBTBD12  | kelch repeat and BTB domain containing 12                     |
| hsa-miR-762 | TMEM8A   | transmembrane protein 8A                                      |
| hsa-miR-762 | NCAM1    | neural cell adhesion molecule 1                               |
| hsa-miR-762 | DAP      | death associated protein                                      |
| hsa-miR-762 | XPC      | XPC complex subunit, DNA damage recognition and repair factor |
| hsa-miR-762 | EPHA8    | EPH receptor A8                                               |
| hsa-miR-762 | OR10W1   | olfactory receptor family 10 subfamily W member 1             |
| hsa-miR-762 | C10orf71 | chromosome 10 open reading frame 71                           |
| hsa-miR-762 | GRPEL1   | GrpE like 1, mitochondrial                                    |
| hsa-miR-762 | NDEL1    | nudE neurodevelopment protein 1 like 1                        |
| hsa-miR-762 | SLC15A3  | solute carrier family 15 member 3                             |
| hsa-miR-762 | BAHCC1   | BAH domain and coiled-coil containing 1                       |
| hsa-miR-762 | HHIPL1   | HHIP like 1                                                   |
| hsa-miR-762 | TTBK1    | tau tubulin kinase 1                                          |
| hsa-miR-762 | BBC3     | BCL2 binding component 3                                      |
| hsa-miR-762 | ABHD14B  | abhydrolase domain containing 14B                             |
| hsa-miR-762 | FAM110B  | family with sequence similarity 110 member B                  |
| hsa-miR-762 | NECAB3   | N-terminal EF-hand calcium binding protein 3                  |
| hsa-miR-762 | RASGRF1  | Ras protein specific guanine nucleotide releasing factor 1    |
| hsa-miR-762 | ILDR1    | immunoglobulin like domain containing receptor 1              |

|             |          |                                                                       |
|-------------|----------|-----------------------------------------------------------------------|
| hsa-miR-762 | SGSM3    | small G protein signaling modulator 3                                 |
| hsa-miR-762 | KCTD20   | potassium channel tetramerization domain containing 20                |
| hsa-miR-762 | EPB41L2  | erythrocyte membrane protein band 4.1 like 2                          |
| hsa-miR-762 | VPS53    | VPS53, GARP complex subunit                                           |
| hsa-miR-762 | LMO2     | LIM domain only 2                                                     |
| hsa-miR-762 | PAF1     | PAF1 homolog, Paf1/RNA polymerase II complex component                |
| hsa-miR-762 | SLC9A7   | solute carrier family 9 member A7                                     |
| hsa-miR-762 | PRELP    | proline and arginine rich end leucine rich repeat protein             |
| hsa-miR-762 | MLXIP    | MLX interacting protein                                               |
| hsa-miR-762 | GBP6     | guanylate binding protein family member 6                             |
| hsa-miR-762 | ATG4B    | autophagy related 4B cysteine peptidase                               |
| hsa-miR-762 | SLC35B4  | solute carrier family 35 member B4                                    |
| hsa-miR-762 | MEGF6    | multiple EGF like domains 6                                           |
| hsa-miR-762 | TENM1    | teneurin transmembrane protein 1                                      |
| hsa-miR-762 | APOA5    | apolipoprotein A5                                                     |
| hsa-miR-762 | PPARGC1B | PPARG coactivator 1 beta                                              |
| hsa-miR-762 | ATP6V0E2 | ATPase H <sup>+</sup> transporting V0 subunit e2                      |
| hsa-miR-762 | AAGAB    | alpha and gamma adaptin binding protein                               |
| hsa-miR-762 | C9orf62  | chromosome 9 open reading frame 62                                    |
| hsa-miR-762 | KRT71    | keratin 71                                                            |
| hsa-miR-762 | STC2     | stanniocalcin 2                                                       |
| hsa-miR-762 | ATP11A   | ATPase phospholipid transporting 11A                                  |
| hsa-miR-762 | CD83     | CD83 molecule                                                         |
| hsa-miR-762 | SNED1    | sushi, nidogen and EGF like domains 1                                 |
| hsa-miR-762 | PLD6     | phospholipase D family member 6                                       |
| hsa-miR-762 | TANC2    | tetratricopeptide repeat, ankyrin repeat and coiled-coil containing 2 |
| hsa-miR-762 | SLC18A3  | solute carrier family 18 member A3                                    |
| hsa-miR-762 | CELF5    | CUGBP Elav-like family member 5                                       |
| hsa-miR-762 | KCNQ2    | potassium voltage-gated channel subfamily Q member 2                  |
| hsa-miR-762 | VPS37D   | VPS37D, ESCRT-I subunit                                               |
| hsa-miR-762 | FSTL1    | folliculin like 1                                                     |
| hsa-miR-762 | GLP2R    | glucagon like peptide 2 receptor                                      |
| hsa-miR-762 | ENTPD1   | ectonucleoside triphosphate diphosphohydrolase 1                      |
| hsa-miR-762 | SYT6     | synaptotagmin 6                                                       |
| hsa-miR-762 | TMEM179  | transmembrane protein 179                                             |
| hsa-miR-762 | HTR6     | 5-hydroxytryptamine receptor 6                                        |
| hsa-miR-762 | ATP5IF1  | ATP synthase inhibitory factor subunit 1                              |
| hsa-miR-762 | C16orf58 | chromosome 16 open reading frame 58                                   |
| hsa-miR-762 | KIAA1549 | KIAA1549                                                              |
| hsa-miR-762 | EIF1AD   | eukaryotic translation initiation factor 1A domain containing         |
| hsa-miR-762 | ZCCHC24  | zinc finger CCHC-type containing 24                                   |
| hsa-miR-762 | CDH5     | cadherin 5                                                            |
| hsa-miR-762 | CATSPERG | cation channel sperm associated auxiliary subunit gamma               |
| hsa-miR-762 | CEP41    | centrosomal protein 41                                                |

|             |              |                                                                     |
|-------------|--------------|---------------------------------------------------------------------|
| hsa-miR-762 | HGSNAT       | heparan-alpha-glucosaminide N-acetyltransferase                     |
| hsa-miR-762 | MESD         | mesoderm development LRP chaperone                                  |
| hsa-miR-762 | ICOSLG       | inducible T cell costimulator ligand                                |
| hsa-miR-762 | CLEC16A      | C-type lectin domain containing 16A                                 |
| hsa-miR-762 | SH3GL2       | SH3 domain containing GRB2 like 2, endophilin A1                    |
| hsa-miR-762 | PRDM16       | PR/SET domain 16                                                    |
| hsa-miR-762 | CYB561A3     | cytochrome b561 family member A3                                    |
| hsa-miR-762 | TMEM104      | transmembrane protein 104                                           |
| hsa-miR-762 | ACTN4        | actinin alpha 4                                                     |
| hsa-miR-762 | INPP5B       | inositol polyphosphate-5-phosphatase B                              |
| hsa-miR-762 | TSPYL1       | TSPY like 1                                                         |
| hsa-miR-762 | STKLD1       | serine/threonine kinase like domain containing 1                    |
| hsa-miR-762 | CLCN7        | chloride voltage-gated channel 7                                    |
| hsa-miR-762 | C1RL         | complement C1r subcomponent like                                    |
| hsa-miR-762 | LMTK3        | lemur tyrosine kinase 3                                             |
| hsa-miR-762 | ANKRD34A     | ankyrin repeat domain 34A                                           |
| hsa-miR-762 | FCER1G       | Fc fragment of IgE receptor Ig                                      |
| hsa-miR-762 | MFN2         | mitofusin 2                                                         |
| hsa-miR-762 | ADM2         | adrenomedullin 2                                                    |
| hsa-miR-762 | TMOD2        | tropomodulin 2                                                      |
| hsa-miR-762 | MUC6         | mucin 6, oligomeric mucus/gel-forming                               |
| hsa-miR-762 | CTNNA3       | catenin alpha 3                                                     |
| hsa-miR-762 | SETDB2-PHF11 | SETDB2-PHF11 readthrough                                            |
| hsa-miR-762 | RAB11FIP5    | RAB11 family interacting protein 5                                  |
| hsa-miR-762 | RNMT         | RNA guanine-7 methyltransferase                                     |
| hsa-miR-762 | CD320        | CD320 molecule                                                      |
| hsa-miR-762 | POLA2        | DNA polymerase alpha 2, accessory subunit                           |
| hsa-miR-762 | ZNF551       | zinc finger protein 551                                             |
| hsa-miR-762 | PLAC9        | placenta specific 9                                                 |
| hsa-miR-762 | ZNF578       | zinc finger protein 578                                             |
| hsa-miR-762 | ASB14        | ankyrin repeat and SOCS box containing 14                           |
| hsa-miR-762 | KIF3C        | kinesin family member 3C                                            |
| hsa-miR-762 | GAPDH        | glyceraldehyde-3-phosphate dehydrogenase                            |
| hsa-miR-762 | PHF11        | PHD finger protein 11                                               |
| hsa-miR-762 | GK5          | glycerol kinase 5                                                   |
| hsa-miR-762 | SELENON      | selenoprotein N                                                     |
| hsa-miR-762 | EPB41        | erythrocyte membrane protein band 4.1                               |
| hsa-miR-762 | RPS6KA1      | ribosomal protein S6 kinase A1                                      |
| hsa-miR-762 | MAP3K9       | mitogen-activated protein kinase kinase kinase 9                    |
| hsa-miR-762 | CNTN2        | contactin 2                                                         |
| hsa-miR-762 | ABLIM2       | actin binding LIM protein family member 2                           |
| hsa-miR-762 | RARA         | retinoic acid receptor alpha                                        |
| hsa-miR-762 | PLCXD1       | phosphatidylinositol specific phospholipase C X domain containing 1 |
| hsa-miR-762 | NUDT5        | nudix hydrolase 5                                                   |

|             |         |                                                                  |
|-------------|---------|------------------------------------------------------------------|
| hsa-miR-762 | TRIM28  | tripartite motif containing 28                                   |
| hsa-miR-762 | HMOX2   | heme oxygenase 2                                                 |
| hsa-miR-762 | DOLPP1  | dolichyldiphosphatase 1                                          |
| hsa-miR-762 | ATF7    | activating transcription factor 7                                |
| hsa-miR-762 | ADGRD1  | adhesion G protein-coupled receptor D1                           |
| hsa-miR-762 | MUC5B   | mucin 5B, oligomeric mucus/gel-forming                           |
| hsa-miR-762 | LPGAT1  | lysophosphatidylglycerol acyltransferase 1                       |
| hsa-miR-762 | UNC5A   | unc-5 netrin receptor A                                          |
| hsa-miR-762 | ARHGAP6 | Rho GTPase activating protein 6                                  |
| hsa-miR-762 | ZNRF1   | zinc and ring finger 1                                           |
| hsa-miR-762 | DMAC2   | distal membrane arm assembly complex 2                           |
| hsa-miR-762 | SPATA46 | spermatogenesis associated 46                                    |
| hsa-miR-762 | GORASP1 | golgi reassembly stacking protein 1                              |
| hsa-miR-762 | UBE2H   | ubiquitin conjugating enzyme E2 H                                |
| hsa-miR-762 | ZDHHC18 | zinc finger DHHC-type containing 18                              |
| hsa-miR-762 | TRPV3   | transient receptor potential cation channel subfamily V member 3 |
| hsa-miR-762 | PLBD2   | phospholipase B domain containing 2                              |
| hsa-miR-762 | TUBG2   | tubulin gamma 2                                                  |
| hsa-miR-762 | DCDC1   | doublecortin domain containing 1                                 |
| hsa-miR-762 | EMSY    | EMSY, BRCA2 interacting transcriptional repressor                |
| hsa-miR-762 | TGOLN2  | trans-golgi network protein 2                                    |

---
